# Supplementary material
Source: HighWire-hosted journal article supplement (https://erj.ersjournals.com/content/56/2/2002328)
Supplement: inline-supplementary-material-1 [file inline-supplementary-material-1.pdf]

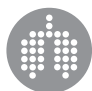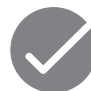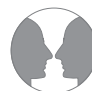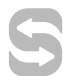

SHAREABLE PDF

# On tuberculosis and COVID-19 co-infection

Marina Tadolini<sup>1</sup>, José-María García-García <sup>2</sup>, François-Xavier Blanc <sup>3</sup>, Sergey Borisov<sup>4</sup>, Delia Goletti<sup>5</sup>, Ilaria Motta<sup>6</sup>, Luigi Ruffo Codecasa<sup>7</sup>, Simon Tiberi <sup>8,9</sup>, Giovanni Sotgiu <sup>10</sup> and Giovanni Battista Migliori <sup>11</sup>, on behalf of the GTN TB/COVID group<sup>12</sup>

**Affiliations:** <sup>1</sup>Unit of Infectious Diseases, Dept of Medical and Surgical Sciences, Alma Mater Studiorum University of Bologna, Bologna, Italy. <sup>2</sup>Tuberculosis Research Programme (PII-TB), SEPAR, Barcelona, Spain. <sup>3</sup>Centre Hospitalier Universitaire, Nantes, France. <sup>4</sup>Moscow Research and Clinical Center for TB Control, Moscow, Russian Federation. <sup>5</sup>Translational Research Unit, National Institute for Infectious Diseases "L. Spallanzani", IRCCS, Rome, Italy. <sup>6</sup>Dipartimento di Scienze Mediche, Clinica Universitaria Malattie Infettive, Ospedale Amedeo di Savoia, Torino, Italia. <sup>7</sup>TB Reference Centre, Villa Marelli Institute, Niguarda Hospital, Milan, Italy. <sup>8</sup>Blizard Institute, Barts and The London School of Medicine and Dentistry, Queen Mary University of London, London, UK. <sup>9</sup>Division of Infection, Royal London Hospital, Barts Health NHS Trust, London, UK. <sup>10</sup>Clinical Epidemiology and Medical Statistics Unit, Department of Medical, Surgical and Experimental Sciences, University of Sassari, Sassari, Italy. <sup>11</sup>Servizio di Epidemiologia Clinica delle Malattie Respiratorie, Istituti Clinici Scientifici Maugeri IRCCS, Tradate, Italy. <sup>12</sup>A list of members of the GTN TB/COVID group can be found in the acknowledgements section.

**Correspondence:** Giovanni Battista Migliori, Servizio di Epidemiologia Clinica delle Malattie Respiratorie, Istituti Clinici Scientifici Maugeri IRCCS, Via Roncaccio 16, Tradate, Varese, 21049, Italy. E-mail: giovannibattista.migliori@icsmaugeri.it

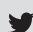

@ERSpublications

**COVID-19 may boost tuberculosis given infection and mortality, further studies are needed** <https://bit.ly/2Z2r5XO>

**Cite this article as:** Tadolini M, García-García J-M, Blanc F-X, *et al.* On tuberculosis and COVID-19 co-infection. *Eur Respir J* 2020; 56: 2002328 [<https://doi.org/10.1183/13993003.02328-2020>].

This single-page version can be shared freely online.

*From the authors:*

We wish to thank A.K. Khurana and D. Aggarwal for their interest in our research letter and comments.
